# Supplementary material
Source: PubMed Central journal article supplement (PMC3772723)
Supplement: NIHMS498621-supplement-SupplementaryTables1-3.pdf [file NIHMS498621-supplement-SupplementaryTables1-3.pdf]

## **Supplementary Material**

**Supplementary Table 1.** Summary characteristics of the participating BCAC case-control studies

**Supplementary Table 2.** Availability of information on tumor morphology and receptor status for Europeans, by each included BCAC study

**Supplementary Table 3.** Genotyping characteristics of each BCAC participating study

**Supplementary Table 1.** Summary characteristics of the 37 participating BCAC studies

| Study (ref. no.)                                                  | Study acronym | Country     | Study design                                                                                       | Specifically selected "genetically-enriched" cases | No. Cases Europeans/Asians | No. Controls Europeans/Asians | Age at diagnosis for European cases: range |
|-------------------------------------------------------------------|---------------|-------------|----------------------------------------------------------------------------------------------------|----------------------------------------------------|----------------------------|-------------------------------|--------------------------------------------|
| Australian Breast Cancer Family Study (1)                         | ABCFS         | Australia   | Population-based case-control study                                                                | No                                                 | 1183 / 58                  | 608 / 16                      | 23 - 69                                    |
| Amsterdam Breast Cancer Study (2)                                 | ABCS          | Netherlands | Hospital-based; population-based controls                                                          | No                                                 | 1112 / 0                   | 986 / 0                       | 22 - 79                                    |
| Asia Cancer Program                                               | ACP           | Thailand    | Hospital-based cases; hospital-based controls                                                      | No                                                 | 0 / 325                    | 0 / 565                       | -- - --                                    |
| Bavarian Breast Cancer Cases and Controls (3-4)                   | BBCC          | Germany     | Hospital-based cases; population-based controls                                                    | No                                                 | 1282 / 0                   | 622 / 0                       | 22 - 96                                    |
| British Breast Cancer Study (5-6)                                 | BBCS          | UK          | Cancer registry and National Cancer Research network (NCRN) based cases; population based controls | Yes                                                | 1150 / 0                   | 828 / 0                       | 26 - 77                                    |
| Breast Cancer in Galway Genetic Study (7-8)                       | BIGGS         | Ireland     | Hospital based-cases; population-based controls                                                    | No                                                 | 937 / 0                    | 840 / 0                       | 24 - 90                                    |
| Breast Cancer Study of the University of Heidelberg (9-10)        | BSUCH         | Germany     | Hospital-based cases; healthy blood donor controls                                                 | No                                                 | 1086 / 0                   | 1315 / 0                      | 25 - 89                                    |
| CECILE Breast Cancer Study (11)                                   | CECILE        | France      | Population-based case-control                                                                      | No                                                 | 1059 / 0                   | 1025 / 0                      | 25 - 74                                    |
| Copenhagen General Population Study (12)                          | CGPS          | Denmark     | Population-based                                                                                   | No                                                 | 2467 / 0                   | 6679 / 0                      | 24 - 95                                    |
| Spanish National Cancer Centre Breast Cancer Study (13)           | CNIO-BCS      | Spain       | Case-control study                                                                                 | Yes                                                | 711 / 0                    | 785 / 0                       | 23 - 86                                    |
| California Teachers Study (14)                                    | CTS           | USA         | Prospective cohort study: nested case-control                                                      | No                                                 | 1246 / 42                  | 1217 / 31                     | 32 - 83                                    |
| ESTHER Breast Cancer Study (15)                                   | ESTHER        | Germany     | Population-based case-control study                                                                | No                                                 | 498 / 0                    | 510 / 0                       | 30 - 79                                    |
| German Consortium for Hereditary Breast & Ovarian Cancer (16)     | GC-HBOC       | Germany     | Population-based familial case-control study                                                       | Yes                                                | 850 / 0                    | 1125 / 0                      | 19 - 87                                    |
| Gene Environment Interaction and Breast Cancer in Germany (17-18) | GENICA        | Germany     | Population-based case-control study                                                                | No                                                 | 961 / 0                    | 983 / 0                       | 23 - 80                                    |
| Genetic Epidemiology Study of Breast Cancer by Age 50 (19)        | GESBC         | Germany     | Population-based study of women ≤50 years                                                          | No                                                 | 471 / 0                    | 554 / 0                       | 24 - 50                                    |
| Hannover Breast Cancer Study (20)                                 | HABCS         | Germany     | Hospital-based case-control study                                                                  | No                                                 | 1005 / 0                   | 995 / 0                       | 25 - 91                                    |
| Helsinki Breast Cancer Study (21-22)                              | HEBCS         | Finland     | Hospital-based case-control study plus additional familial cases                                   | Yes                                                | 2372 / 0                   | 1265 / 0                      | 22 - 95                                    |
| Hannover-Minsk Breast Cancer Study (23)                           | HMBCS         | Belarus *   | Hospital-based cases; population-based controls                                                    | No                                                 | 1764 / 0                   | 1018 / 0                      | 16 - 82                                    |
| Hannover-Ufa Breast Cancer Study (23)                             | HUBCS         | Russia *    | Hospital-based cases; population-based controls                                                    | No                                                 | 862 / 60                   | 1458 / 53                     | 25 - 85                                    |

| Study (ref. no.)                                                                                                            | Study acronym | Country                   | Study design                                                                                                                               | Specifically selected "genetically-enriched" cases | No. Cases Europeans/Asians | No. Controls Europeans/Asians | Age at diagnosis for European cases: range |
|-----------------------------------------------------------------------------------------------------------------------------|---------------|---------------------------|--------------------------------------------------------------------------------------------------------------------------------------------|----------------------------------------------------|----------------------------|-------------------------------|--------------------------------------------|
| Karolinska Breast Cancer Study (24-25)                                                                                      | KARBAC        | Sweden                    | Population and hospital-based cases; geographically matched controls                                                                       | Yes                                                | 817 / 0                    | 869 / 0                       | 24 - 88                                    |
| Kuopio Breast Cancer Project (26-27)                                                                                        | KBCP          | Finland                   | Hospital-based prospective clinical cohort                                                                                                 | No                                                 | 484 / 0                    | 356 / 0                       | 23 - 92                                    |
| Kathleen Cunningham Foundation Consortium for research into Familial Breast Cancer/ Australian Ovarian Cancer Study (28-29) | KConFab/ AOCS | Australia and New Zealand | Clinic-based recruitment of familial breast cancer patients (cases); population-based case-control study of ovarian cancer (controls only) | Yes                                                | 622 / 0                    | 932 / 0                       | 17 - 77                                    |
| Leuven Multidisciplinary Breast Centre (30-31)                                                                              | LMBC          | Belgium                   | Hospital-based case-control study                                                                                                          | No                                                 | 2930 / 0                   | 1613 / 0                      | 21 - 95                                    |
| Mammary Carcinoma Risk Factor Investigation (32)                                                                            | MARIE         | Germany                   | Population-based case-control study                                                                                                        | No                                                 | 2523 / 0                   | 4867 / 0                      | 50 - 75                                    |
| Milan Breast Cancer Study Group (33-34)                                                                                     | MBCSG         | Italy                     | Clinic-based recruitment of familial/early onset breast cancer patients (cases); population-based controls                                 | Yes                                                | 752 / 0                    | 1356 / 0                      | 21 - 80                                    |
| Mayo Clinic Breast Cancer Study (35)                                                                                        | MCBCS         | USA                       | Hospital-based case-control study                                                                                                          | No                                                 | 2077 / 0                   | 2120 / 0                      | 22 - 93                                    |
| Melbourne Collaborative Cohort Study (36)                                                                                   | MCCS          | Australia                 | Prospective cohort study                                                                                                                   | No                                                 | 450 / 0                    | 617 / 0                       | 37 - 80                                    |
| Northern California Breast Cancer Family Registry (37)                                                                      | NC-BCFR       | USA                       | Population-based familial case-control study                                                                                               | Yes                                                | 389 / 460                  | 154 / 61                      | 26 - 65                                    |
| Oulu Breast Cancer Study (38)                                                                                               | OBCS          | Finland                   | Hospital-based case-control study                                                                                                          | No                                                 | 537 / 0                    | 496 / 0                       | 28 - 92                                    |
| Ontario Familial Breast Cancer Registry (37)                                                                                | OFBCR         | Canada *                  | Population-based familial case-control study                                                                                               | Yes                                                | 1093 / 120                 | 320 / 15                      | 24 - 81                                    |
| Leiden University Medical Centre Breast Cancer Study (39-40)                                                                | ORIGO         | Netherlands               | Hospital-based prospective cohort study                                                                                                    | No                                                 | 1221 / 0                   | 899 / 0                       | 22 - 88                                    |
| Rotterdam Breast Cancer Study (41)                                                                                          | RBCS          | Netherlands               | Hospital based case-control study, Rotterdam area                                                                                          | Yes                                                | 792 / 0                    | 799 / 0                       | 18 - 24                                    |
| Singapore and Sweden Breast Cancer Study (42)                                                                               | SASBAC        | Sweden                    | Population-based case-control study                                                                                                        | No                                                 | 1226 / 0                   | 1466 / 0                      | 50 - 75                                    |
| Sheffield Breast Cancer Study (43)                                                                                          | SBCS          | UK                        | Hospital-based case-control study                                                                                                          | No                                                 | 979 / 0                    | 948 / 0                       | 28 - 92                                    |
| Study of Epidemiology and Risk factors in Cancer Heredity (44)                                                              | SEARCH        | UK                        | Population-based case-control study                                                                                                        | No                                                 | 6271 / 36                  | 6696 / 10                     | 23 - 69                                    |
| UCI Breast Cancer Study (45-46)                                                                                             | UCIBCS        | USA                       | Population-based case-control study                                                                                                        | No                                                 | 742 / 46                   | 440 / 14                      | 24 - 90                                    |
| UK Breakthrough Generations Study (47)                                                                                      | UKBGS         | UK                        | Prospective cohort study: nested case-control study of women who had had breast cancer prior to entry into the cohort                      | No                                                 | 2326 / 0                   | 2310 / 0                      | 24 - 84                                    |
| <b>TOTAL</b>                                                                                                                |               |                           |                                                                                                                                            |                                                    | <b>47247 / 1147</b>        | <b>50071 / 765</b>            |                                            |

\*All participants from HMBCS and HUBCS and those in OFBCR who self-reported themselves as being Eastern European were taken as being "Eastern Europeans" in sub-ethnic analyses

## References

1. Dite GS, Jenkins MA, Southey MC, Hocking JS, Giles GG, McCredie MR, et al. Familial risks, early-onset breast cancer, and BRCA1 and BRCA2 germline mutations. *J Natl Cancer Inst* 2003;95:448-57.
2. Adank MA, Jonker MA, Kluijft I, van Mil SE, Oldenburg RA, Mooi WJ, et al. CHEK2\*1100delC homozygosity is associated with a high breast cancer risk in women. *J Med Genet* 2011;48:860-3.
3. Fasching PA, Loehberg CR, Strissel PL, Lux MP, Bani MR, Schrauder M, et al. Single nucleotide polymorphisms of the aromatase gene (CYP19A1), HER2/neu status, and prognosis in breast cancer patients. *Breast Cancer Res Treat* 2008;112:89-98.
4. Schrauder M, Frank S, Strissel PL, Lux MP, Bani MR, Rauh C, et al. Single nucleotide polymorphism D1853N of the ATM gene may alter the risk for breast cancer. *J Cancer Res Clin Oncol* 2008;134:873-82.
5. Fletcher O, Johnson N, Orr N, Hosking FJ, Gibson LJ, Walker K, et al. Novel breast cancer susceptibility locus at 9q31.2: results of a genome-wide association study. *J Natl Cancer Inst* 2011;103:425-35.
6. Fletcher O, Johnson N, Palles C, dos Santos Silva I, McCormack V, Whittaker J, et al. Inconsistent association between the STK15 F31I genetic polymorphism and breast cancer risk. *J Natl Cancer Inst* 2006;98:1014-8.
7. Collieran G, McInerney N, Rowan A, Barclay E, Jones AM, Curran C, et al. The TGFBR1\*6A/9A polymorphism is not associated with differential risk of breast cancer. *Breast Cancer Res Treat* 2010;119:437-42.
8. McInerney N, Collieran G, Rowan A, Walther A, Barclay E, Spain S, et al. Low penetrance breast cancer predisposition SNPs are site specific. *Breast Cancer Res Treat* 2009;117:151-9.
9. Yang R, Dick M, Marme F, Schneeweiss A, Langheinz A, Hemminki K, et al. Genetic variants within miR-126 and miR-335 are not associated with breast cancer risk. *Breast Cancer Res Treat* 2011;127:549-54.
10. Marme F, Werft W, Benner A, Burwinkel B, Sinn P, Sohn C, et al. FGFR4 Arg388 genotype is associated with pathological complete response to neoadjuvant chemotherapy for primary breast cancer. *Ann Oncol* 2010;21:1636-42.
11. Villeneuve S, Fevotte J, Anger A, Truong T, Lamkarkach F, Gaye O, et al. Breast cancer risk by occupation and industry: analysis of the CECILE study, a population-based case-control study in France. *Am J Ind Med* 2011;54:499-509.
12. Weischer M, Bojesen SE, Tybjaerg-Hansen A, Axelsson CK, Nordestgaard BG. Increased risk of breast cancer associated with CHEK2\*1100delC. *J Clin Oncol* 2007;25:57-63.
13. Milne RL, Ribas G, Gonzalez-Neira A, Fagerholm R, Salas A, Gonzalez E, et al. ERCC4 associated with breast cancer risk: a two-stage case-control study using high-throughput genotyping. *Cancer Res* 2006;66:9420-7.
14. Bernstein L, Allen M, Anton-Culver H, Deapen D, Horn-Ross PL, Peel D, et al. High breast cancer incidence rates among California teachers: results from the California Teachers Study (United States). *Cancer Causes Control* 2002;13:625-35.
15. Widschwendter M, Apostolidou S, Raum E, Rothenbacher D, Fiegl H, Menon U, et al. Epigenotyping in peripheral blood cell DNA and breast cancer risk: a proof of principle study. *Plos One* 2008;3(7):e2656.
16. Frank B, Hemminki K, Wappenschmidt B, Meindl A, Klaes R, Schmutzler RK, et al. Association of the CASP10 V410I variant with reduced familial breast cancer risk and interaction with the CASP8 D302H variant. *Carcinogenesis* 2006;27:606-9.
17. Justenhoven C, Pierl CB, Haas S, Fischer HP, Baisch C, Hamann U, et al. The CYP1B1\_1358\_GG genotype is associated with estrogen receptor-negative breast cancer. *Breast Cancer Res Treat* 2008;111:171-7.

18. Pesch B, Ko Y, Brauch H, Hamann U, Harth V, Rabstein S, et al. Factors modifying the association between hormone-replacement therapy and breast cancer risk. *Eur J Epidemiol* 2005;20:699-711.
19. Chang-Claude J, Eby N, Kiechle M, Bastert G, Becher H. Breastfeeding and breast cancer risk by age 50 among women in Germany. *Cancer Causes Control* 2000;11:687-95.
20. Dork T, Bendix R, Bremer M, Rades D, Klopper K, Nicke M, et al. Spectrum of ATM gene mutations in a hospital-based series of unselected breast cancer patients. *Cancer Res* 2001;61:7608-15.
21. Kilpivaara O, Bartkova J, Eerola H, Syrjakoski K, Vahteristo P, Lukas J, et al. Correlation of CHEK2 protein expression and c.1100delC mutation status with tumor characteristics among unselected breast cancer patients. *Int J Cancer* 2005;113:575-80.
22. Syrjakoski K, Vahteristo P, Eerola H, Tamminen A, Kivinummi K, Sarantaus L, et al. Population-based study of BRCA1 and BRCA2 mutations in 1035 unselected Finnish breast cancer patients. *J Natl Cancer Inst* 2000;92(18):1529-31.
23. Bogdanova N, Cybulski C, Bermisheva M, Datsyuk I, Yamini P, Hillemanns P, et al. A nonsense mutation (E1978X) in the ATM gene is associated with breast cancer. *Breast Cancer Res Treat* 2009;118:207-11.
24. Margolin S, Werelius B, Fornander T, Lindblom A. BRCA1 mutations in a population-based study of breast cancer in Stockholm County. *Genet Test* 2004;8:127-32.
25. Lindblom A, Rotstein S, Larsson C, Nordenskjold M, Iselius L. Hereditary breast cancer in Sweden: a predominance of maternally inherited cases. *Breast Cancer Res Treat* 1992;24:159-65.
26. Hartikainen JM, Tuhkanen H, Kataja V, Eskelinen M, Uusitupa M, Kosma VM, et al. Refinement of the 22q12-q13 breast cancer--associated region: evidence of TMPRSS6 as a candidate gene in an eastern Finnish population. *Clin Cancer Res* 2006;12:1454-62.
27. Hartikainen JM, Tuhkanen H, Kataja V, Dunning AM, Antoniou A, Smith P, et al. An autosome-wide scan for linkage disequilibrium-based association in sporadic breast cancer cases in eastern Finland: three candidate regions found. *Cancer Epidemiol Biomarkers Prev* 2005;14:75-80.
28. Beesley J, Jordan SJ, Spurdle AB, Song H, Ramus SJ, Kjaer SK, et al. Association between single-nucleotide polymorphisms in hormone metabolism and DNA repair genes and epithelial ovarian cancer: results from two Australian studies and an additional validation set. *Cancer Epidemiol Biomarkers Prev* 2007;16:2557-65.
29. Mann GJ, Thorne H, Balleine RL, Butow PN, Clarke CL, Edkins E, et al. Analysis of cancer risk and BRCA1 and BRCA2 mutation prevalence in the kConFab familial breast cancer resource. *Breast Cancer Res* 2006;8:R12.
30. De Maeyer L, Van Limbergen E, De Nys K, Moerman P, Pochet N, Hendrickx W, et al. Does estrogen receptor negative/progesterone receptor positive breast carcinoma exist? *J Clin Oncol* 2008;26:335-6.
31. Neven P, Brouckaert O, Van Belle V, Vanden Bempt I, Hendrickx W, Cho H, et al. In early-stage breast cancer, the estrogen receptor interacts with correlation between human epidermal growth factor receptor 2 status and age at diagnosis, tumor grade, and lymph node involvement. *J Clin Oncol* 2008;26:1768-9.
32. Flesch-Janys D, Slinger T, Mutschelknauss E, Kropp S, Obi N, Vettorazzi E, et al. Risk of different histological types of postmenopausal breast cancer by type and regimen of menopausal hormone therapy. *Int J Cancer* 2008;123:933-41.
33. Catucci I, Verderio P, Pizzamiglio S, Manoukian S, Peissel B, Barile M, et al. SNPs in ultraconserved elements and familial breast cancer risk. *Carcinogenesis* 2009;30:544-5.
34. De Vecchi G, Verderio P, Pizzamiglio S, Manoukian S, Barile M, Fortuzzi S, et al. Evidences for association of the CASP8 -652 6N del promoter polymorphism with age at diagnosis in familial breast cancer cases. *Breast Cancer Res Treat* 2009;113:607-8.
35. Olson JE, Ma CX, Pelleymounter LL, Schaid DJ, Pankratz VS, Vierkant RA, et al. A comprehensive examination of CYP19 variation and breast density. *Cancer Epidemiol Biomarkers Prev* 2007;16(3):623-5.

36. Giles GG, English DR. The Melbourne Collaborative Cohort Study. *IARC Sci Publ* 2002;156:69-70.
37. John EM, Hopper JL, Beck JC, Knight JA, Neuhausen SL, Senie RT, et al. The Breast Cancer Family Registry: an infrastructure for cooperative multinational, interdisciplinary and translational studies of the genetic epidemiology of breast cancer. *Breast Cancer Res* 2004;6(4):R375-89.
38. Erkkö H, Xia B, Nikkila J, Schleutker J, Syrjäkoski K, Mannermaa A, et al. A recurrent mutation in PALB2 in Finnish cancer families. *Nature* 2007;446(7133):316-9.
39. de Bock GH, Schutte M, Krol-Warmerdam EM, Seynaeve C, Blom J, Brekelmans CT, et al. Tumour characteristics and prognosis of breast cancer patients carrying the germline CHEK2\*1100delC variant. *J Med Genet* 2004;41(10):731-5.
40. Huijts PE, Vreeswijk MP, Kroeze-Jansema KH, Jacobi CE, Seynaeve C, Krol-Warmerdam EM, et al. Clinical correlates of low-risk variants in FGFR2, TNRC9, MAP3K1, LSP1 and 8q24 in a Dutch cohort of incident breast cancer cases. *Breast Cancer Res* 2007;9(6):R78.
41. Easton DF, Pooley KA, Dunning AM, Pharoah PD, Thompson D, Ballinger DG, et al. Genome-wide association study identifies novel breast cancer susceptibility loci. *Nature* 2007;447(7148):1087-93.
42. Wedren S, Lovmar L, Humphreys K, Magnusson C, Melhus H, Syvanen AC, et al. Oestrogen receptor alpha gene haplotype and postmenopausal breast cancer risk: a case control study. *Breast Cancer Res* 2004;6(4):R437-49.
43. MacPherson G, Healey CS, Teare MD, Balasubramanian SP, Reed MW, Pharoah PD, et al. Association of a common variant of the CASP8 gene with reduced risk of breast cancer. *J Natl Cancer Inst* 2004;96(24):1866-9.
44. Pharoah PD, Lipscombe JM, Redman KL, Day NE, Easton DF, Ponder BA. Familial predisposition to breast cancer in a British population: implications for prevention. *Eur J Cancer* 2000;36(6):773-9.
45. Anton-Culver H, Cohen PF, Gildea ME, Ziogas A. Characteristics of BRCA1 mutations in a population-based case series of breast and ovarian cancer. *Eur J Cancer* 2000;36(10):1200-8.
46. Ziogas A, Gildea M, Cohen P, Bringman D, Taylor TH, Seminara D, et al. Cancer risk estimates for family members of a population-based family registry for breast and ovarian cancer. *Cancer Epidemiol Biomarkers Prev* 2000;9(1):103-11.
47. Swerdlow AJ, Jones ME, Schoemaker MJ, Hemming J, Thomas D, Williamson J, et al. The Breakthrough Generations Study: design of a long-term UK cohort study to investigate breast cancer aetiology. *Br J Cancer* 2011;105(7):911-7.

**Supplementary Table 2.** Availability of information on morphology and receptor status for Europeans, by each included BCAC study

| Study Acronym | Total no. of BC cases | Morphology   |      |                    |     | Receptor Status    |           |                    |           |                      |           |
|---------------|-----------------------|--------------|------|--------------------|-----|--------------------|-----------|--------------------|-----------|----------------------|-----------|
|               |                       | No. invasive | (%)* | No. <i>in situ</i> | (%) | No. with ER status | (+ve) (%) | No. with PR status | (+ve) (%) | No. with HER2 status | (+ve) (%) |
| ABCFS         | 1183                  | 1183         | 100  | 0                  | 0   | 1028               | 66        | 1024               | 69        | 0                    | 0         |
| ABCS          | 1112                  | 697          | 63   | 63                 | 6   | 374                | 74        | 0                  | 0         | 0                    | 0         |
| BBCC          | 1282                  | 1226         | 96   | 56                 | 4   | 1178               | 72        | 1174               | 65        | 901                  | 17        |
| BBCS          | 1150                  | 1150         | 100  | 0                  | 0   | 0                  | 0         | 0                  | 0         | 0                    | 0         |
| BIGGS         | 937                   | 886          | 95   | 51                 | 5   | 698                | 75        | 535                | 77        | 0                    | 0         |
| BSUCH         | 1086                  | 1067         | 98   | 19                 | 2   | 812                | 71        | 812                | 61        | 761                  | 19        |
| CECILE        | 1059                  | 936          | 88   | 123                | 12  | 981                | 84        | 970                | 71        | 718                  | 13        |
| CGPS          | 2467                  | 2383         | 97   | 84                 | 3   | 2184               | 84        | 1616               | 62        | 536                  | 76        |
| CNIO-BCS      | 711                   | 678          | 95   | 33                 | 5   | 237                | 75        | 255                | 56        | 123                  | 53        |
| CTS           | 1246                  | 1246         | 100  | 0                  | 0   | 0                  | 0         | 0                  | 0         | 0                    | 0         |
| ESTHER        | 498                   | 435          | 87   | 5                  | 1   | 428                | 76        | 422                | 67        | 195                  | 27        |
| GC-HBOC       | 850                   | 850          | 100  | 0                  | 0   | 0                  | 0         | 0                  | 0         | 0                    | 0         |
| GENICA        | 961                   | 961          | 100  | 0                  | 0   | 914                | 78        | 911                | 70        | 646                  | 28        |
| GESBC         | 471                   | 432          | 92   | 32                 | 7   | 348                | 62        | 342                | 58        | 0                    | 0         |
| HABCS         | 1005                  | 993          | 99   | 12                 | 1   | 676                | 90        | 609                | 88        | 0                    | 0         |
| HEBCS         | 2372                  | 2220         | 94   | 152                | 6   | 2225               | 81        | 2224               | 65        | 1356                 | 15        |
| HMBCS         | 1764                  | 1764         | 100  | 0                  | 0   | 0                  | 0         | 0                  | 0         | 0                    | 0         |
| HUBCS         | 862                   | 862          | 100  | 0                  | 0   | 206                | 55        | 206                | 56        | 195                  | 50        |
| KARBAC        | 817                   | 817          | 100  | 0                  | 0   | 444                | 83        | 388                | 76        | 0                    | 0         |
| KBCP          | 484                   | 462          | 95   | 22                 | 5   | 434                | 76        | 432                | 62        | 393                  | 13        |
| kConFab/AOCS  | 622                   | 433          | 70   | 106                | 17  | 226                | 69        | 200                | 70        | 0                    | 0         |
| LMBC          | 2930                  | 2732         | 93   | 198                | 7   | 2710               | 85        | 2699               | 77        | 2509                 | 13        |
| MARIE         | 2523                  | 2362         | 94   | 161                | 6   | 2420               | 78        | 2418               | 66        | 1400                 | 20        |
| MBCSG         | 752                   | 308          | 41   | 29                 | 4   | 304                | 77        | 304                | 67        | 198                  | 52        |

|              |              |              |           |             |          |              |           |              |           |              |           |
|--------------|--------------|--------------|-----------|-------------|----------|--------------|-----------|--------------|-----------|--------------|-----------|
| MCBCS        | 2077         | 1730         | 83        | 347         | 17       | 1978         | 84        | 1977         | 74        | 1347         | 15        |
| MCCS         | 450          | 450          | 0         | 0           | 0        | 375          | 74        | 375          | 65        | 156          | 28        |
| NC-BCFR      | 389          | 268          | 69        | 121         | 31       | 272          | 85        | 271          | 73        | 0            | 0         |
| OBCS         | 537          | 530          | 99        | 7           | 1        | 537          | 80        | 536          | 70        | 537          | 14        |
| OFBCR        | 1093         | 1076         | 98        | 17          | 2        | 866          | 71        | 848          | 61        | 0            | 0         |
| ORIGO        | 1221         | 1096         | 90        | 98          | 8        | 878          | 73        | 727          | 60        | 0            | 0         |
| RBCS         | 792          | 739          | 93        | 51          | 6        | 610          | 73        | 519          | 64        | 113          | 11        |
| SASBAC       | 1226         | 1226         | 100       | 0           | 0        | 856          | 82        | 833          | 72        | 0            | 0         |
| SBCS         | 979          | 878          | 90        | 70          | 7        | 560          | 79        | 241          | 59        | 256          | 7         |
| SEARCH       | 6271         | 6271         | 100       | 0           | 0        | 2949         | 81        | 2008         | 70        | 1356         | 11        |
| UCIBCS       | 742          | 643          | 87        | 99          | 13       | 567          | 79        | 560          | 70        | 0            | 0         |
| UKBGS        | 2326         | 2244         | 96        | 78          | 3        | 0            | 0         | 0            | 0         | 0            | 0         |
| <b>Total</b> | <b>47247</b> | <b>44234</b> | <b>94</b> | <b>2034</b> | <b>4</b> | <b>29275</b> | <b>79</b> | <b>26539</b> | <b>69</b> | <b>13696</b> | <b>20</b> |



**Supplementary Table 3.** Genotyping characteristics of each participating BCAC study

| Study Acronym | No. of Cases | No. of Controls | Sample size Total | Genotyping platform | Call Rate Overall (%) | HWE (Controls) * P-value |
|---------------|--------------|-----------------|-------------------|---------------------|-----------------------|--------------------------|
| ABCFS         | 1241         | 624             | 1865              | TaqMan              | 99.2                  | 0.39                     |
| ABCS          | 1112         | 986             | 2098              | iPLEX               | 99.6                  | 0.73                     |
| ACP           | 325          | 565             | 890               | iPLEX               | 99.9                  | 0.74                     |
| BBCC          | 1282         | 622             | 1904              | iPLEX               | 99.6                  | 0.65                     |
| BBCS          | 1150         | 828             | 1978              | iPLEX               | 99.7                  | 0.71                     |
| BIGGS         | 937          | 840             | 1777              | iPLEX               | 98.6                  | 0.20                     |
| BSUCH         | 1086         | 1315            | 2401              | MALDI-TOF MS        | 99.7                  | 0.19                     |
| CECILE        | 1059         | 1025            | 2084              | TaqMan              | 99.5                  | 0.07                     |
| CGPS          | 2467         | 6679            | 9146              | TaqMan              | 99.2                  | 0.08                     |
| CNIO-BCS      | 711          | 785             | 1496              | iPLEX               | 99.7                  | 0.28                     |
| CTS           | 1288         | 1248            | 2536              | iPLEX               | 100.0                 | 0.04                     |
| ESTHER        | 498          | 510             | 1008              | MALDI-TOF MS        | 100.0                 | 0.46                     |
| GC-HBOC       | 850          | 1125            | 1975              | MALDI-TOF MS        | 99.7                  | 0.37                     |
| GENICA        | 961          | 983             | 1944              | iPLEX               | 99.8                  | 0.49                     |
| GESBC         | 471          | 554             | 1025              | iPLEX               | 99.3                  | 0.86                     |
| HABCS         | 1005         | 995             | 2000              | TaqMan              | 99.9                  | 0.41                     |
| HEBCS         | 2372         | 1265            | 3637              | iPLEX               | 99.8                  | 0.31                     |
| HMBCS         | 1764         | 1018            | 2782              | TaqMan              | 99.0                  | 0.60                     |
| HUBCS         | 922          | 1511            | 2433              | TaqMan              | 100.0                 | 0.75                     |
| KARBAC        | 817          | 869             | 1686              | TaqMan              | 97.5                  | 0.77                     |
| KBCP          | 484          | 356             | 840               | iPLEX               | 99.4                  | 0.55                     |
| kConFab/AOCS  | 622          | 932             | 1554              | iPLEX               | 99.6                  | 0.41                     |
| LMBC          | 2930         | 1613            | 4543              | iPLEX               | 99.9                  | 0.02                     |
| MARIE         | 2523         | 4867            | 7390              | iPLEX               | 99.7                  | 0.03                     |
| MBCSG         | 752          | 1356            | 2108              | MALDI-TOF MS        | 100.0                 | 0.56                     |
| MCBCS         | 2077         | 2120            | 4197              | TaqMan              | 100.0                 | 0.78                     |
| MCCS          | 450          | 617             | 1067              | TaqMan              | 99.2                  | 0.49                     |
| NC-BCFR       | 849          | 215             | 1064              | TaqMan              | 99.9                  | 1.00                     |
| OBCS          | 537          | 496             | 1033              | iPLEX               | 99.3                  | 0.62                     |
| OFBCR         | 1213         | 335             | 1548              | iPLEX               | 99.4                  | 0.91                     |
| ORIGO         | 1221         | 899             | 2120              | TaqMan              | 99.4                  | 0.67                     |
| RBCS          | 792          | 799             | 1591              | TaqMan              | 98.1                  | 0.94                     |
| SASBAC        | 1226         | 1466            | 2692              | iPLEX               | 98.8                  | 0.12                     |
| SBCS          | 979          | 948             | 1927              | iPLEX               | 99.0                  | 0.50                     |
| SEARCH        | 6307         | 6706            | 13013             | TaqMan              | 100.0                 | 0.29                     |
| UCIBCS        | 788          | 454             | 1242              | iPLEX               | 99.8                  | 0.22                     |
| UKBGS         | 2326         | 2310            | 4636              | TaqMan              | 100.0                 | 0.83                     |
| <b>Total</b>  | <b>48394</b> | <b>50836</b>    | <b>99230</b>      |                     |                       |                          |

\* Departure from Hardy-Weinberg Equilibrium (HWE) tested among controls using  $\chi^2$  (1df) and a threshold of P=0.01
